# Supplementary material for: Electrochemical fabrication of gold nanoparticles decorated on activated fullerene C60: an enhanced sensing platform for trace level detection of toxic hydrazine in water samples
Source: Royal Society of Chemistry journal article supplement (doi:10.1039/c5ra17197k), 2015-01-01
Supplement: c5ra17197k1.pdf [file c5ra17197k1.pdf]

**Electrochemical fabrication of gold nanoparticles decorated on activated fullerene C60; An enhanced sensing platform for trace level detection of toxic hydrazine in water samples**

Selvakumar Palanisamy, Balamurugan Thirumalraj, Shen-Ming Chen\*

Electroanalysis and Bioelectrochemistry Lab, Department of Chemical Engineering and Biotechnology, National Taipei University of Technology, No. 1, Section 3, Chung-Hsiao East Road, Taipei 106, Taiwan, ROC.

\*E-mail: [smchen78@ms15.hinet.net](mailto:smchen78@ms15.hinet.net); Fax: +886-2-27025238; Tel: +886-2-27017147.

**Supporting information**

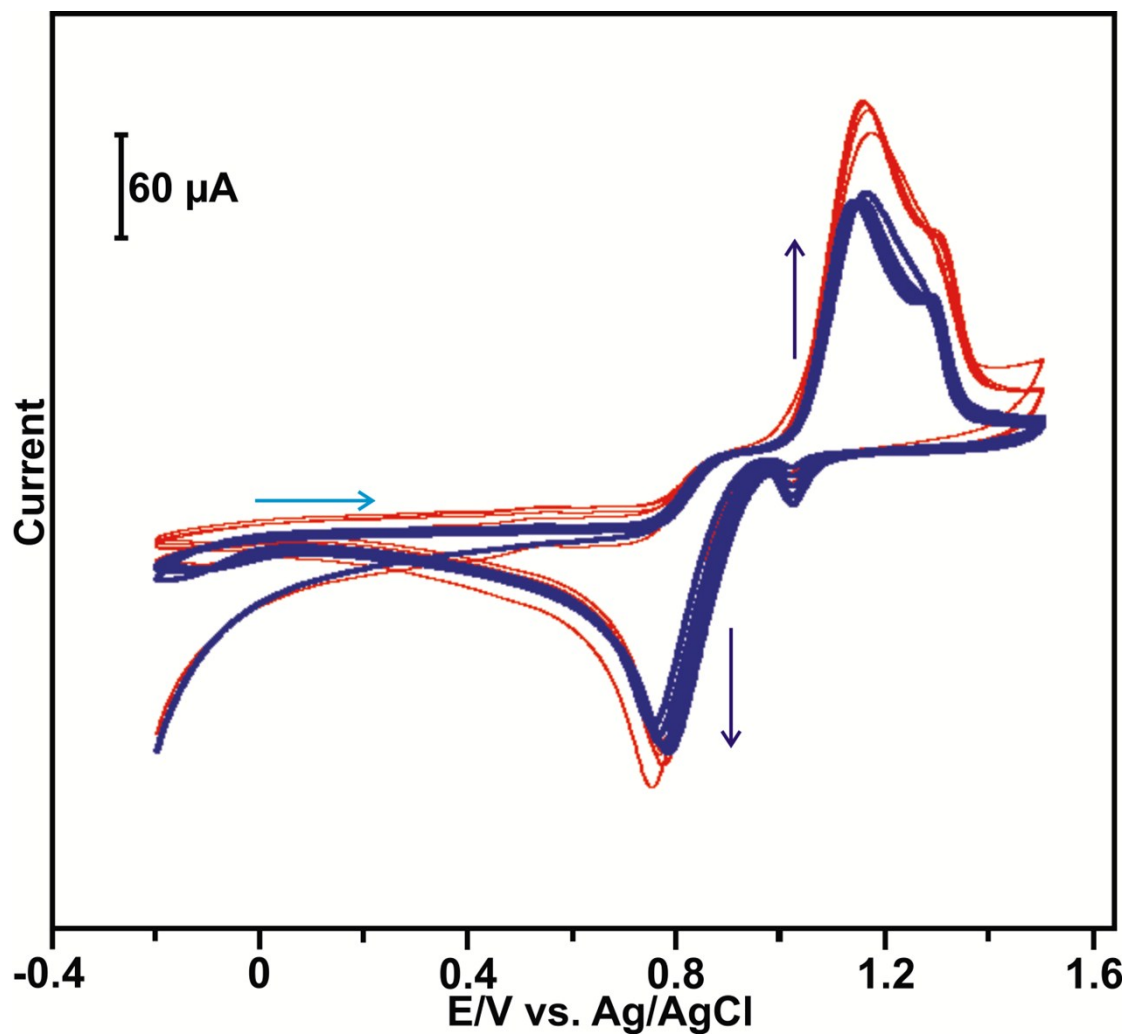

**Fig. S1** Electrochemical deposition of AuNPs on AC60 (red line) and C60 (blue line) modified SPCEs by 5 consecutive cyclic voltammograms in the electrochemical cell containing 1.3 mM  $\text{K}(\text{AuCl}_4) \cdot 3\text{H}_2\text{O} + 0.5 \text{ M } \text{H}_2\text{SO}_4$  at the scan rate of  $50 \text{ mV s}^{-1}$ .

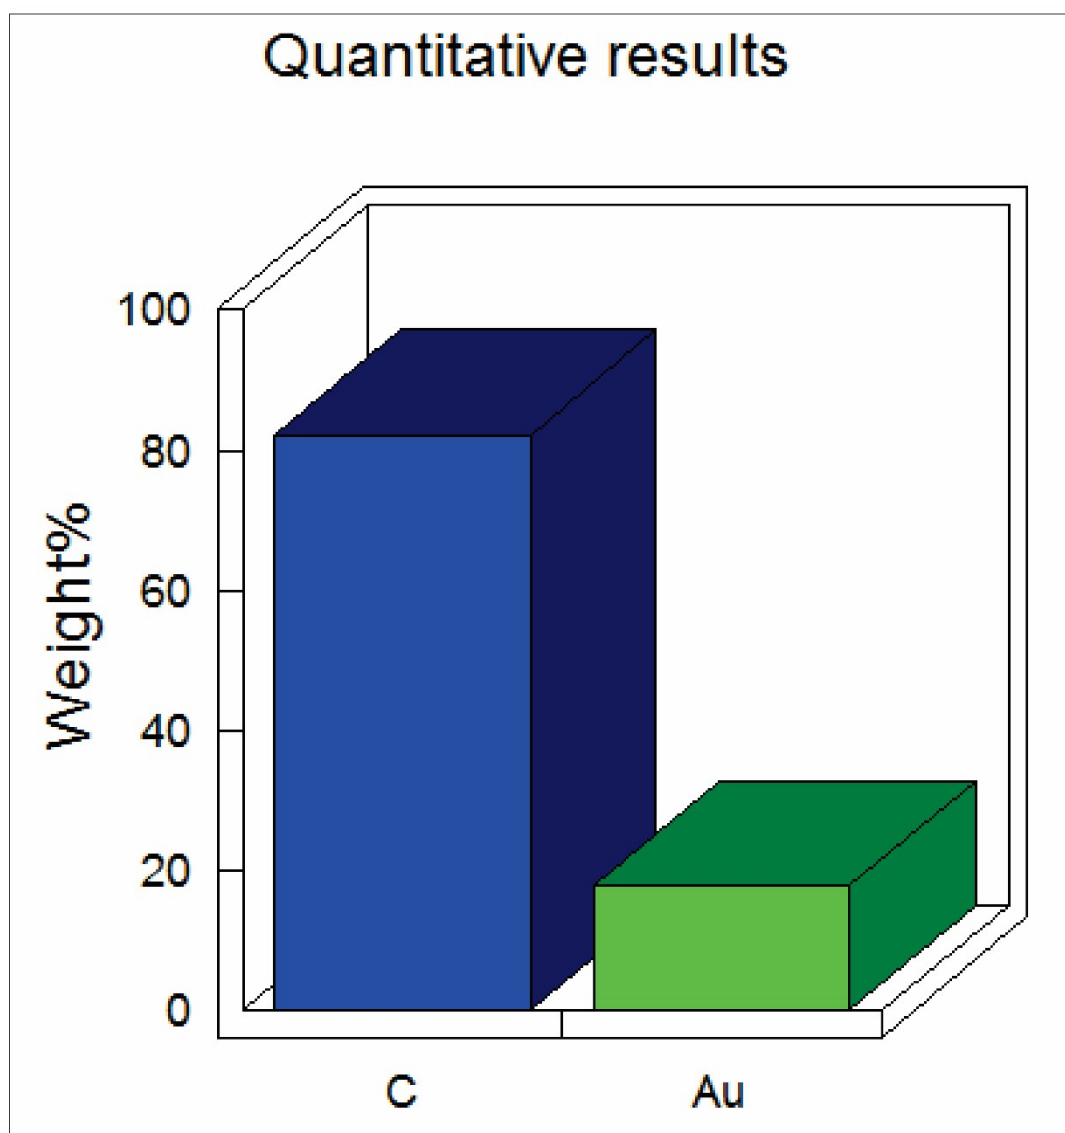

**Fig. S2** Quantitative results of EDX profile for AC60-AuNPs modified SPCE.

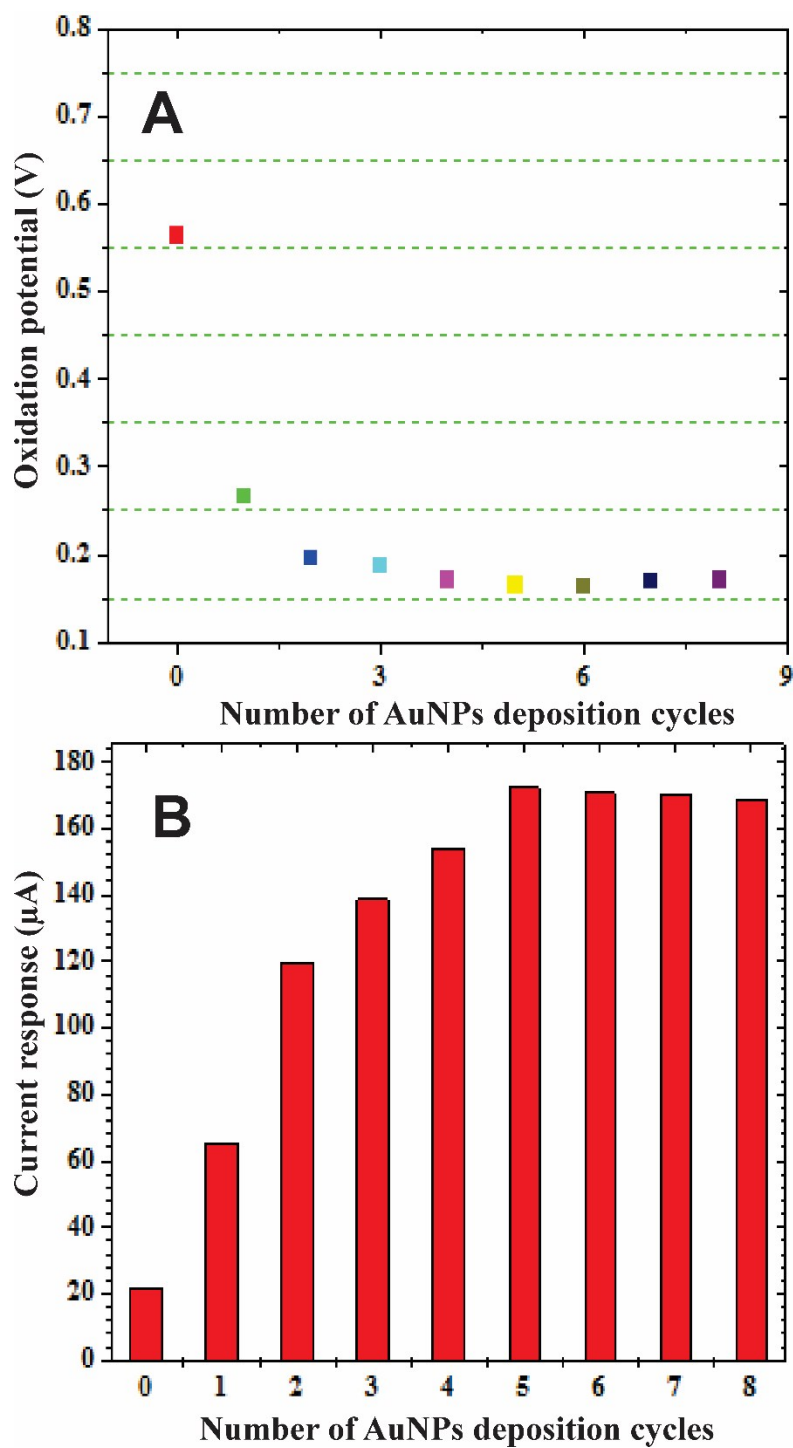

**Fig. S3** Optimization of AuNPs electrodeposition on AC60 modified SPCE; Different AuNPs deposition cycle vs. peak potential (A) and peak current response (B) for 1 mM hydrazine in  $\text{N}_2$  saturated PBS at a scan rate of  $50 \text{ mV s}^{-1}$ .

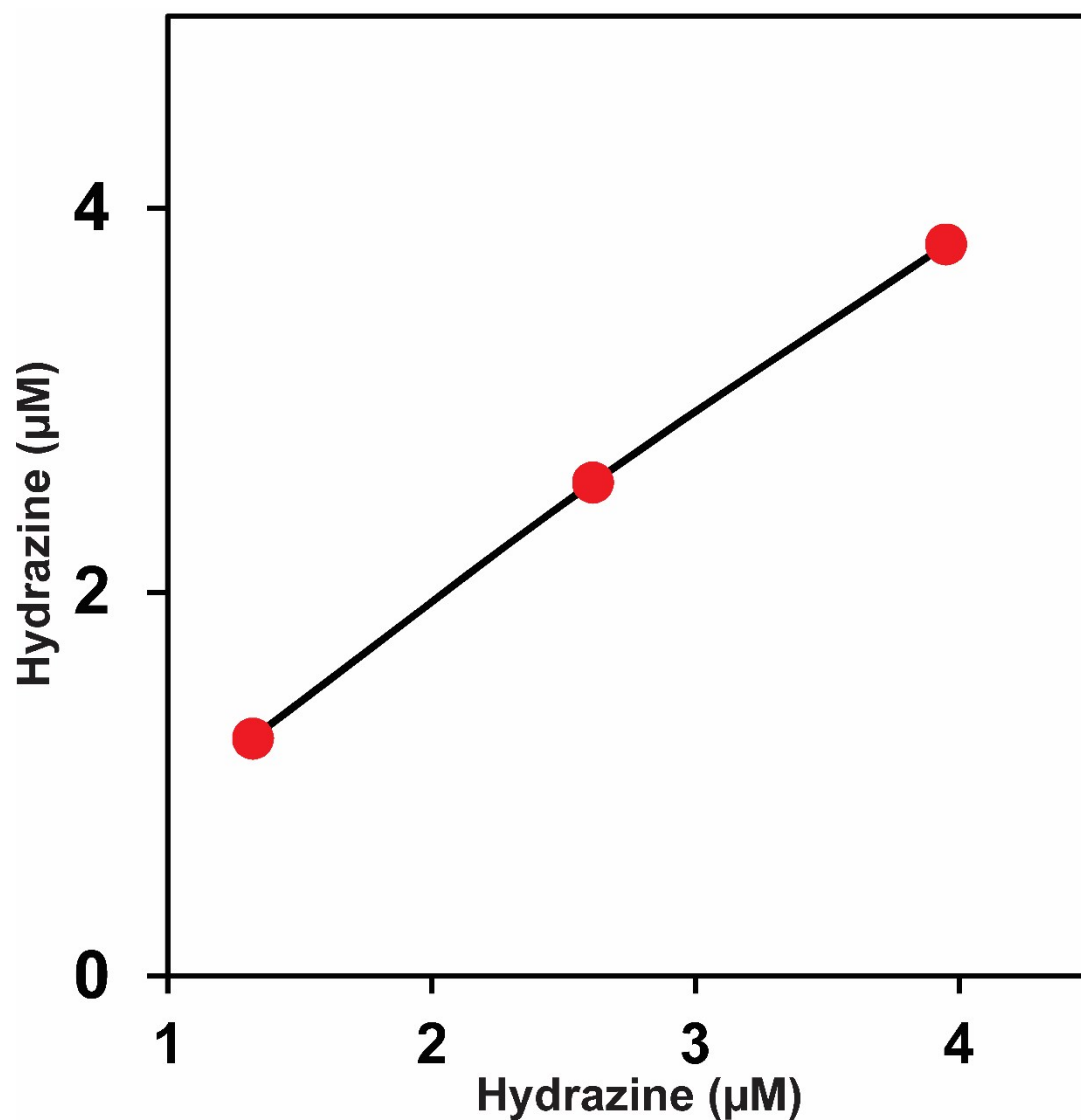

**Fig. S4** Correlation between the results obtained for the detection of hydrazine by AC60-AuNPs modified electrode and HPLC method. *x* axis: hydrazine electrochemical sensor (AC60-AuNPs modified electrode); *y* axis: HPLC method.

**Table ST1** Comparison of analytical performance (sensitivity, LOD and LCR) of AC60–AuNPs

| Modified electrode                               | Method | Sensitivity<br>( $\mu\text{A}\mu\text{M}^{-1}\text{ cm}^{-2}$ ) | LOD<br>( $\mu\text{M}$ ) | LCR<br>( $\mu\text{M}$ ) | Ref.      |
|--------------------------------------------------|--------|-----------------------------------------------------------------|--------------------------|--------------------------|-----------|
| AuCu <sub>3</sub> /AuBPE                         | FIA    | 0.164                                                           | 0.04                     | up to 1000               | 1         |
| (Au-SH-SiO <sub>2</sub> @Cu-MOF)/GCE             | DPV    | 0.1                                                             | 0.01                     | up to 1000               | 2         |
| AuNPs/GPE                                        | Amp.   | –                                                               | 3.07                     | up to 1000               | 3         |
| GR/Pectin AuNPs/GCE                              | Amp.   | 1.786                                                           | 0.0016                   | up to 197.4              | 4         |
| AG/AuNPs/SPCE                                    | Amp.   | 0.54                                                            | 0.00057                  | up to 936                | 5         |
| AuNPs/choline/GCE                                | LSV    | 0.0843                                                          | 0.1                      | up to 500                | 6         |
| ZnO/Nf/AuE                                       | Amp.   | 0.015                                                           | 0.25                     | up to 200                | 7         |
| $\gamma$ -Fe <sub>2</sub> O <sub>3</sub> /Au/GCE | Amp.   | 0.060                                                           | 0.006                    | up to 11                 | 8         |
| Au/ZnO-MWCNT/GCE                                 | Amp.   | 0.0428                                                          | 0.15                     | up to 1800               | 9         |
| AuNPs/TWEEN/GO/GCE                               | Amp.   | NA                                                              | 0.078                    | up to 0.003              | 10        |
| AC60–AuNPs/SPCE                                  | Amp.   | 0.583                                                           | 0.039                    | up to 1210               | This work |

modified SPCE with previously reported AuNPs based hydrazine sensors.

### Abbreviations;

LOD – limit of detection, LCR – linear concentration range, AuBPE – barrel-plated gold electrode, FIA – flow injection analysis, (Au-SH-SiO<sub>2</sub>@Cu-MOF) – Metal-organic frameworks, GCE – glassy carbon electrode, DPV – differential pulse voltammetry, AuNPs – gold nanoparticles, GPE – graphite paste electrode, GR – graphene, AG – activated graphite, SPCE – screen printed carbon electrode, LSV – linear sweep voltammetry, ZnO – zinc oxide, Nf – nafion, AuE – gold electrode,  $\gamma$ -Fe<sub>2</sub>O<sub>3</sub> – iron oxide nanoparticles, Au – nano gold, MWCNT – multiwalled carbon nanotubes, GO – graphene oxide.

## References

1. Y.C. Choua, C.Y. Taia, J.F. Leeb, T.S. Chanb and J.M. Zena, *Electrochim. Acta*, 2013, **104**, 104–109.
2. H. Hosseini, H. Ahmar, A. Dehghani, A. Bagheri, A.R. Fakhari and M.M. Amini, *Electrochim. Acta*, 2013, **88**, 301–309.
3. M.A. Aziz and A.N. Kawde, *Talanta*, 2013, **115**, 214–221.
4. R. Devasenathipathy, V. Mani, S.M. Chen, D. Arulraj and V.S. Vasantha, *Electrochim. Acta*, 2014, **135**, 260–269.
5. C. Karuppiah, S. Palanisamy, S.M. Chen, S.K. Ramaraj and P. Periakaruppan, *Electrochim. Acta*, 2014, **139**, 157–164.
6. J. Li, H. Xie and L. Chen, *Sens. Actuators B*, 2011, **153**, 239–245.
7. Y. Ni, J. Zhu, L. Zhang and J. Hong, *CrystEngComm.*, 2010, **12**, 2213–2218.
8. Y. You, Y. Yang and Z. Yang, *J. Solid State Electrochem.*, 2013, **17**, 701–706.
9. C. Zhang, G. Wang, Y. Ji, M. Liu, Y. Feng, Z. Zhang and B. Fang, *Sens. Actuators B*, 2011, **153**, 239–245.
10. W. Lu, R. Ning, X. Qin, Y. Zhang, G. Chang, S. Liu, Y. Luo and X. Sun, *J. Hazard. Mater.*, 2011, **197**, 320–326.
